# Supplementary material
Source: Research Square preprint supplement (doi:10.21203/rs.3.rs-9620951/v1)
Supplement: Supplementary file 1 [file b57ec67248f87481ba6ae040.docx]

|  | **Number of patients with blood-CSF barrier dysfunction** (QAlb* > age-specific cut-off) | **Mean Age** (SD †)in years | **Male sex** n (%) | ***APOE ε4* homozygousgenotype** | ***APOE ε4* heterozygousgenotype** | **Non-*APOE*  *ε4* genotype** | **Unknown *APOE* genotype** | **CSF total protein concentration** mg/L | **Mean CSF albumin concen tration** (SD†)mg/L | **Mean serum albumin concentration** (SD†)g/L | **Mean CSF/serum albumin quotient** (QAlb**103) |
| --- | --- | --- | --- | --- | --- | --- | --- | --- | --- | --- | --- |
| **All** | **14/37 (38%)** | **66 (16.3)** | **11 (30%)** | **2 (5.4%)** | **24 (65%)** | **4 (11%)** | **7(19%)** | **517.8 (335.2)** | **330.6 (243)** | **39.3 (3.8)** | **8.5 (6.5)** |
| **Diagnosis group** |  | | | | | | | | | | |
| **Inflammatory neurological diseases** | 7/8 (88%) | 50 (16.6) | 3/8 (37.5%) | 0 | 1 *ε3/ε4* | 0 | 7 | 785.9 (598.2) | 515 (436.9) | 37.6 (3) | 13.5 (11.7) |
| **Neurodegenerative diseases** | 7/27 | 72 (7.7) | 8/27 (29.6%) | 2/27 (7.4%) | 20 *ε3/ε4* (74%)  1 *ε2/ε4* (3.7%) | 4 | 0 | 453.2 (178.6) | 287.5 (132) | 39.8 (4.1) | 7.3 (3.4) |
| **Psychiatric diseases** | 0/2 | 42 (15) | 0/2 | 0 | 2 *ε3/ε4* (100%) | 0 | 0 | 317.8 (167.1) | 173,9 (107.8) | 38.8 (1.4) | 4.4 (2.5) |

**Table 1: Patient characteristics**

*QAlb: CSF/serum albumin quotient. †SD: standard deviation.
