# Supplementary material
Source: Research Square preprint supplement (doi:10.21203/rs.3.rs-9620951/v1)
Supplement: Supplementary file 2 [file f324ca296468100f7a6c22d8.docx]

**Supplementary Material**

**Supplementary Table: Patient diagnosis**

| **Diagnosis** | **Age** (SD) | **Male sex** (%) | **Number of participants** (in brackets: number of those with blood-CSF barrier dysfunction: QAlb > age-specific cut-off) | **ApoE4 carrier** *n*(%) |
| --- | --- | --- | --- | --- |
| **All/Total** | **66 (16.3)** | **11 (30%)** | **37 (14)** | **27 (72.9%)** |
| Guillan-Barrè syndrome (GBS)* | / | | 5 (5) | 1/5 (20%) |
| Bickerstaff brainstem encephalitis* | 1 (1) | 0 |
| Facial and hypoglossal nerve paresis and CSF pleocytosis of unknown etiology* | 1 (1) | 0 |
| Alzheimer’s disease† | 20 (4) | 20 (100%) |
| Alzheimer’s disease A+T+N+ | 18 (5) | 18/18 (100%) |
| Alzheimer’s disease A+T-N+ | 1 (0) | 1/1(100%) |
| Alzheimer’s disease A+T-N- | 1 (1) | 1/1 (100%) |
| Vascular dementia† | 4 (1) | 1/4 (25%) |
| Behavioural variant frontotemporal dementia (bvFTD)† | 1 (0) | 0 |
| Spinocerebellar ataxia (SCA)† | 2 (0) | 1/2 (50%) |
| Immune-mediated necrotizing myopathy (IMNM)* | 1 (0) | 1/1 (100%) |
| Depression-related cognitive impairment‡ | 1 (0) | 1/1 (100%) |
| Psychogenic nonepileptic seizures (PNES)‡ | 1 (0) | 1/1 (100%) |

Diagnosis group in main text: *: Inflammatory neurological diseases. †: Neurodegenerative diseases. ‡: Psychiatric diseases.
